# Supplementary material for: Loss of Wave1 gene defines a subtype of lethal prostate cancer
Source: PubMed Central journal article supplement (PMC4494945; doi:10.18632/oncotarget.3564), 2015-03-31
Supplement: oncotarget-06-12383-s001.pdf [file oncotarget-06-12383-s001.pdf]

SUPPLEMENTARY FIGURE AND TABLES

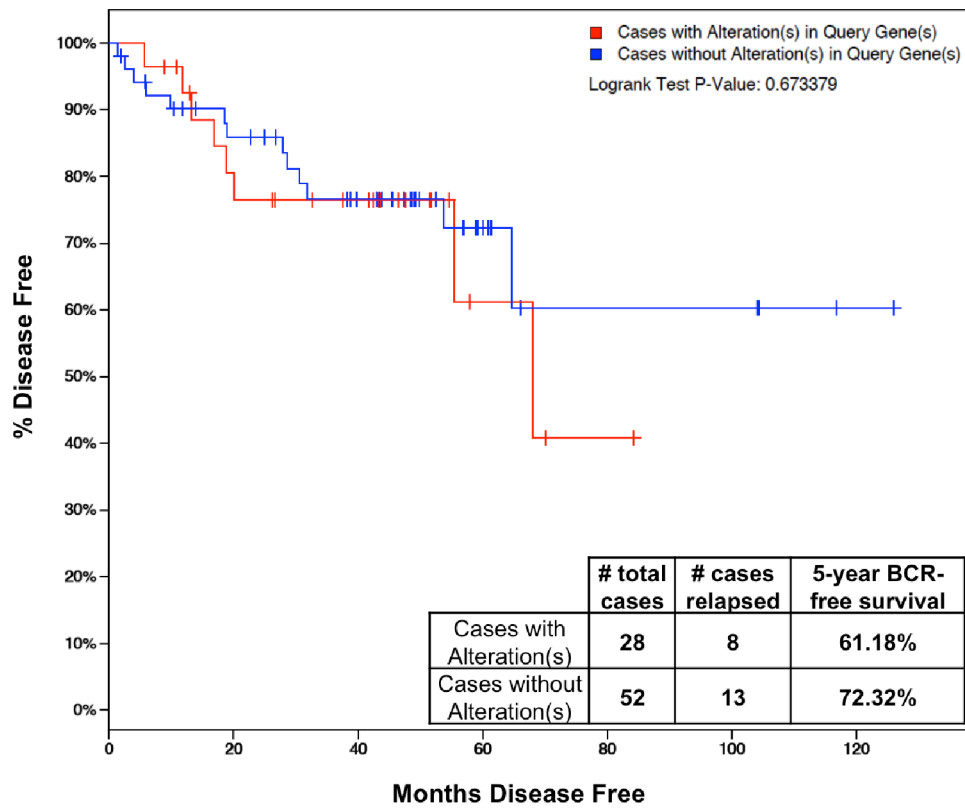

**Supplementary Figure 1: Alterations in WAVE complex genes in tumors increase the rate of biochemical recurrence within five years.** Kaplan-Meier survival distribution showing the time until biochemical recurrence for patients with alterations in WAVE complex genes (*AB11*, *AB12*, *AB13*, *BRK1*, *CYFIP1*, *CYFIP2*, *NCKAP1*, *NCKAP1L*, *WASF1*, *WASF2*, and *WASF3*) from the MSKCC data set.

**Supplementary Table 1: Normalized RSEM values for WAVE complex genes from RNA-seq in prostate TCGA cases.** RSEM values were self-normalized against the 75th percentile of all RSEM values within each case.

**Supplementary Table 2: z-score values for gene expression variance of WAVE complex genes from RNA-seq in prostate TCGA cases.** z-scores were determined by subtracting each normalized RSEM value from the mean for the sample set, and dividing that difference by the standard deviation for each gene (across the sample).

**Supplementary Table 3: Tumor cell purity determined by gene expression of prostate TCGA cases.** ESTIMATE was used to apply 141-gene signatures for stromal cell contamination and immune cell contamination to infer a tumor cell purity (percentage).

**Supplementary Table 4: Copy number values for 487 TCGA prostate cases.** A value of 1 indicates normal heterozygosity (two copies).

**Supplementary Table 5: Gene expression values for the MSKCC (primary PCa) and BIDMC (CRPC) datasets.** SCAN was used to normalize both microarray platforms to the same scale.

**Supplementary Table 6: z-score values for gene expression variance across the MSKCC (primary PCa) and BIDMC (CRPC) datasets.** z-scores were determined by subtracting each gene value from the mean for the sample set, and dividing that difference by the standard deviation for each gene (across the sample).

**Supplementary Table 7: Copy number calls for the MSKCC dataset.** -2 indicates homozygous deletion. -1 indicates hemizygous deletion. 0 indicates no copy number change. 1 indicates copy number gain. 2 indicates high amplification.

**Supplementary Table 8: Copy number calls for the UMICH dataset.** -2 indicates homozygous deletion. -1 indicates hemizygous deletion. 0 indicates no copy number change. 1 indicates copy number gain. 2 indicates high amplification.

**Supplementary Table 9: Gene expression values for the genes determined by GenePattern to contribute most to the *WASF1*-high vs. *WASF1*-low phenotypes.** Values represent SCAN-normalized intensities.

**Supplementary Table 10: Gene expression values for the AR activity geneset.** Values represent SCAN-normalized intensities.
